# Supplementary material for: The UV absorption of nucleobases: semi-classical ab initio spectra simulations
Source: Royal Society of Chemistry journal article supplement (doi:10.1039/b924956g), 2010-01-01
Supplement: b924956g.pdf [file b924956g.pdf]

## Supporting Information

# The UV Absorption of Nucleobases: Semi-Classical *Ab Initio* Spectrum Simulations

Mario Barbatti, Adelia J. A. Aquino, and Hans Lischka

|                                                                      |           |
|----------------------------------------------------------------------|-----------|
| <b>SUPPORTING INFORMATION</b> .....                                  | <b>1</b>  |
| <b>I. FEATURES OF THE EXPERIMENTAL AND THEORETICAL SPECTRA</b> ..... | <b>2</b>  |
| <b>II. VERTICAL EXCITATIONS</b> .....                                | <b>3</b>  |
| A. ADENINE – CC2/TZVP .....                                          | 3         |
| B. ADENINE – CC2/TZVP-AUG .....                                      | 3         |
| C. GUANINE – CC2/SVP .....                                           | 3         |
| D. GUANINE – CC2/TZVP .....                                          | 4         |
| E. GUANINE – CC2/TZVP-AUG .....                                      | 5         |
| F. CYTOSINE – CC2/TZVP .....                                         | 5         |
| G. CYTOSINE – CC2/TZVP-AUG .....                                     | 6         |
| H. THYMINE – CC2/TZVP .....                                          | 6         |
| I. THYMINE – CC2/TZVP-AUG .....                                      | 7         |
| J. URACIL – CC2/TZVP .....                                           | 7         |
| K. URACIL – CC2/TZVP-AUG .....                                       | 8         |
| <b>III. OPTIMIZED GEOMETRIES AT CC2/TZVP LEVEL</b> .....             | <b>9</b>  |
| A. ADENINE .....                                                     | 9         |
| B. GUANINE .....                                                     | 9         |
| C. CYTOSINE .....                                                    | 9         |
| D. THYMINE .....                                                     | 10        |
| E. URACIL .....                                                      | 10        |
| <b>REFERENCES</b> .....                                              | <b>11</b> |

## I. Features of the experimental and theoretical spectra

| Base | Ref.                                      | Phase | $\Delta E$ (eV) |             |             |      |      |
|------|-------------------------------------------|-------|-----------------|-------------|-------------|------|------|
|      |                                           |       | Sh1             | Max1        | Sh2         | Sh3  | Max2 |
| Ade  | Present work                              | V     |                 | 5.26        |             |      | 6.38 |
|      |                                           | 1     |                 | 5.07        |             |      |      |
|      |                                           | 2     |                 | 4.92        |             |      | 5.99 |
|      |                                           | 3     | W               |             | 4.78        |      |      |
|      |                                           | 4     | W               |             | 4.78        |      |      |
| Gua  | Present work (SVP)<br>Present work (TZVP) | V     |                 | (4.94,5.65) |             |      | 7.27 |
|      |                                           | V     |                 | (4.81,5.49) |             |      |      |
|      |                                           | 2     |                 | (4.23,4.37) |             |      |      |
|      |                                           | 3     | W               |             | (4.50,5.07) |      |      |
|      |                                           | 4     | W               |             | (4.44,4.92) |      |      |
| Cyt  | Present work                              | V     |                 | 4.65        |             | 5.62 | 6.40 |
|      |                                           | 2     | V               | 4.28        | ~4.77       |      |      |
|      |                                           | 3     | W               |             | 4.65        |      |      |
|      |                                           | 4     | W               |             | 4.56        | 4.99 | 5.38 |
|      |                                           | 5     | W               |             | 4.66        | 5.39 | 5.85 |
| Thy  | Present work                              | V     |                 | 5.23        |             |      | 6.58 |
|      |                                           | 3     | W               |             | 4.70        |      |      |
|      |                                           | 4     | W               |             | 4.61        |      |      |
| Ura  | Present work                              | V     |                 | 5.36        |             |      | 6.96 |
|      |                                           | 2     | V               |             | 5.08        | 6.05 | 6.63 |
|      |                                           | 3     | W               |             | 4.79        |      |      |

Sh – Shoulder; Max – maximum; V – vapor; W – in water.

## II. Vertical excitations

### A. Adenine – CC2/TZVP

| State           | Assignment              | $\Delta E$ (eV) | $f$   | Main contribution | %    |
|-----------------|-------------------------|-----------------|-------|-------------------|------|
| S <sub>1</sub>  | n $\rightarrow$ $\pi^*$ | 5.20            | 0.003 | 33a-36a           | 79.2 |
| S <sub>2</sub>  | $\pi\rightarrow\pi^*$   | 5.29            | 0.070 | 35a-38a           | 44.5 |
|                 |                         |                 |       | 34a-36a           | 31.6 |
| S <sub>3</sub>  | $\pi\rightarrow\pi^*$   | 5.42            | 0.301 | 35a-36a           | 83.1 |
| S <sub>4</sub>  | n $\rightarrow$ $\pi^*$ | 5.86            | 0.004 | 33a-38a           | 87.4 |
| S <sub>5</sub>  | n $\rightarrow$ $\pi^*$ | 6.26            | 0.007 | 31a-38a           | 87.2 |
| S <sub>6</sub>  | $\pi\rightarrow\pi^*$   | 6.55            | 0.455 | 34a-36a           | 44.6 |
|                 |                         |                 |       | 35a-38a           | 24.6 |
| S <sub>7</sub>  | $\pi\rightarrow R_{3s}$ | 6.74            | 0.009 | 35a-37a           | 33.4 |
|                 |                         |                 |       | 35a-39a           | 31.3 |
| S <sub>8</sub>  | $\pi\rightarrow\pi^*$   | 6.83            | 0.074 | 32a-36a           | 57.7 |
| S <sub>9</sub>  | $\pi\rightarrow\pi^*$   | 6.92            | 0.044 | 35a-40a           | 46.0 |
|                 |                         |                 |       | 35a-41a           | 15.2 |
| S <sub>10</sub> | n $\rightarrow$ $\pi^*$ | 7.03            | 0.014 | 31a-38a           | 72.8 |

### B. Adenine – CC2/TZVP-aug

| State           | Assignment              | $\Delta E$ (eV) | $f$   | Main contribution | %    |
|-----------------|-------------------------|-----------------|-------|-------------------|------|
| S <sub>1</sub>  | n $\rightarrow$ $\pi^*$ | 5.11            | 0.003 | 33a-52a           | 19.2 |
|                 |                         |                 |       | 33a-50a           | 16.8 |
| S <sub>2</sub>  | $\pi\rightarrow\pi^*$   | 5.20            | 0.073 | 35a-58a           | 30.5 |
| S <sub>3</sub>  | $\pi\rightarrow\pi^*$   | 5.25            | 0.212 | 35a-58a           | 19.6 |
|                 |                         |                 |       | 35a-50a           | 11.5 |
| S <sub>4</sub>  | $\pi\rightarrow R_{3s}$ | 5.47            | 0.009 | 35a-36a           | 45.3 |
| S <sub>5</sub>  | n $\rightarrow$ $\pi^*$ | 5.75            | 0.005 | 33a-58a           | 58.9 |
| S <sub>6</sub>  | $\pi\rightarrow R_{3s}$ | 5.80            | 0.005 | 35a-37a           | 41.9 |
|                 |                         |                 |       | 35a-36a           | 22.6 |
| S <sub>7</sub>  | n $\rightarrow R_{3s}$  | 6.02            | 0.028 | 33a-36a           | 56.2 |
| S <sub>9</sub>  | n $\rightarrow\pi^*$    | 6.19            | 0.016 | 31a-52a           | 18.5 |
|                 |                         |                 |       | 31a-50a           | 15.7 |
| S <sub>9</sub>  | $\pi\rightarrow R_{3s}$ | 6.24            | 0.001 | 35a-38a           | 50.1 |
| S <sub>10</sub> | n $\rightarrow R_{3s}$  | 6.29            | 0.333 | 33a-37a           | 18.2 |
|                 | $\pi\rightarrow\pi^*$   |                 |       | 35a-58a           | 10.2 |

### C. Guanine – CC2/SVP

| State          | Assignment            | $\Delta E$ (eV) | $f$   | Main contribution | %    |
|----------------|-----------------------|-----------------|-------|-------------------|------|
| S <sub>1</sub> | $\pi\rightarrow\pi^*$ | 5.26            | 0.210 | 39a-40a           | 79.8 |
| S <sub>2</sub> | n $\rightarrow\pi^*$  | 5.64            | 0.002 | 35a-41a           | 32.3 |
|                |                       |                 |       | 37a-41a           | 30.4 |
| S <sub>3</sub> | $\pi\rightarrow\pi^*$ | 5.89            | 0.263 | 39a-41a           | 75.0 |
| S <sub>4</sub> | n $\rightarrow\pi^*$  | 6.26            | 0.000 | 37a-40a           | 68.8 |
| S <sub>5</sub> | n $\rightarrow\pi^*$  | 6.48            | 0.000 | 35a-40a           | 72.5 |

|                 |                                   |      |       |         |      |
|-----------------|-----------------------------------|------|-------|---------|------|
| S <sub>6</sub>  | n→π <sup>*</sup>                  | 6.72 | 0.004 | 35a-41a | 37.5 |
|                 |                                   |      |       | 37a-41a | 36.0 |
| S <sub>7</sub>  | π→π <sup>*</sup> /R <sub>3s</sub> | 6.84 | 0.006 | 39a-42a | 55.1 |
| S <sub>8</sub>  | π→π <sup>*</sup>                  | 6.97 | 0.019 | 39a-45a | 43.2 |
|                 | π→π <sup>*</sup> /R <sub>3s</sub> |      |       | 39a-44a | 20.5 |
| S <sub>9</sub>  | π→R <sub>3s</sub>                 | 7.34 | 0.002 | 39a-43a | 95.5 |
| S <sub>10</sub> | n→π <sup>*</sup>                  | 7.42 | 0.119 | 33a-40a | 32.2 |
|                 |                                   |      |       | 37a-45a | 12.5 |
| S <sub>11</sub> | π→π <sup>*</sup>                  | 7.45 | 0.083 | 38a-41a | 43.2 |
|                 |                                   |      |       | 36a-40a | 29.3 |
| S <sub>12</sub> | π→π <sup>*</sup>                  | 7.50 | 0.377 | 38a-41a | 22.0 |
|                 |                                   |      |       | 36a-41a | 18.3 |
|                 |                                   |      |       | 36a-40a | 15.9 |
| S <sub>13</sub> | π→π <sup>*</sup>                  | 7.51 | 0.363 | 38a-40a | 57.9 |
| S <sub>14</sub> | π→π <sup>*</sup>                  | 7.90 | 0.005 | 36a-41a | 24.4 |
|                 | n→π <sup>*</sup> /R <sub>3s</sub> |      |       | 37a-42a | 12.7 |
| S <sub>15</sub> | π→π <sup>*</sup> /R <sub>3s</sub> | 7.97 | 0.011 | 39a-44a | 40.3 |
| S <sub>16</sub> | n→π <sup>*</sup>                  | 8.01 | 0.009 | 33a-40a | 39.7 |
|                 |                                   |      |       | 37a-45a | 18.9 |
| S <sub>17</sub> | π→π <sup>*</sup>                  | 8.10 | 0.103 | 36a-41a | 22.0 |
|                 | n→π <sup>*</sup> /R <sub>3s</sub> |      |       | 37a-42a | 20.3 |
| S <sub>18</sub> | π→π <sup>*</sup>                  | 8.20 | 0.013 | 34a-40a | 40.9 |
|                 |                                   |      |       | 39a-45a | 11.2 |
| S <sub>19</sub> | n→R <sub>3s</sub>                 | 8.42 | 0.011 | 37a-43a | 72.8 |
| S <sub>20</sub> | π→π <sup>*</sup> /R <sub>3s</sub> | 8.45 | 0.018 | 36a-42a | 29.6 |
|                 |                                   |      |       | 39a-44a | 18.4 |

#### D. Guanine – CC2/TZVP

| State           | Assignment                    | ΔE (eV) | f     | Main contribution | %    |
|-----------------|-------------------------------|---------|-------|-------------------|------|
| S <sub>1</sub>  | π→π <sup>*</sup>              | 5.13    | 0.194 | 39a-41a           | 67.6 |
| S <sub>2</sub>  | n→π <sup>*</sup>              | 5.56    | 0.003 | 35a-43a           | 26.7 |
|                 |                               |         |       | 37a-43a           | 22.4 |
| S <sub>3</sub>  | π→π <sup>*</sup>              | 5.67    | 0.286 | 39a-43a           | 83.2 |
| S <sub>4</sub>  | π→R <sub>3s</sub>             | 6.03    | 0.005 | 39a-40a           | 67.0 |
| S <sub>5</sub>  | n→π <sup>*</sup>              | 6.21    | 0.00  | 37a-41a           | 50.2 |
| S <sub>6</sub>  | n→π <sup>*</sup>              | 6.36    | 0.00  | 35a-41a           | 54.7 |
| S <sub>7</sub>  | π→π <sub>R</sub> <sup>*</sup> | 6.57    | 0.001 | 39a-42a           | 79.6 |
| S <sub>8</sub>  | n→π <sup>*</sup>              | 6.61    | 0.003 | 37a-43a           | 39.8 |
| S <sub>9</sub>  | π→π <sup>*</sup>              | 6.70    | 0.02  | 39a-46a           | 64.4 |
| S <sub>10</sub> | n→R <sub>3s</sub>             | 7.13    | 0.034 | 35a-40a           | 22.9 |
|                 |                               |         |       | 37a-40a           | 21.9 |
| S <sub>11</sub> | π→π <sup>*</sup>              | 7.21    | 0.215 | 38a-43a           | 33.5 |
|                 |                               |         |       | 36a-41a           | 17.0 |
| S <sub>12</sub> | π→π <sup>*</sup>              | 7.22    | 0.254 | 38a-43a           | 19.4 |
|                 |                               |         |       | 34a-40a           | 11.8 |
| S <sub>13</sub> | π→π <sup>*</sup>              | 7.31    | 0.178 | 38a-41a           | 33   |
|                 |                               |         |       | 38a-43a           | 14.9 |
| S <sub>14</sub> | π→R <sub>3s</sub>             | 7.33    | 0.02  | 39a-45a           | 58.8 |
| S <sub>15</sub> | π→R <sub>3s</sub>             | 7.36    | 0.228 | 39a-44a           | 30.3 |
|                 | π→π <sup>*</sup>              |         |       | 36a-41a           | 18.7 |

## E. Guanine – CC2/TZVP-aug

| State           | Assignment                | $\Delta E$ (eV) | $f$   | Main contribution | %    |
|-----------------|---------------------------|-----------------|-------|-------------------|------|
| S <sub>1</sub>  | $\pi \rightarrow R_{3s}$  | 4.90            | 0.064 | 39a-40a           | 45.2 |
|                 | $\pi \rightarrow \pi^*$   |                 |       | 39a-60a           | 12.4 |
| S <sub>2</sub>  | $\pi \rightarrow \pi^*$   | 4.97            | 0.099 | 39a-60a           | 34.4 |
|                 | $\pi \rightarrow R_{3s}$  |                 |       | 39a-40a           | 18.4 |
| S <sub>3</sub>  | $\pi \rightarrow R_{3s}$  | 5.30            | 0.013 | 39a-41a           | 71.4 |
| S <sub>4</sub>  | $\pi \rightarrow \pi^*$   | 5.40            | 0.269 | 39a-64a           | 22.5 |
|                 |                           |                 |       | 39a-61a           | 17.7 |
| S <sub>5</sub>  | $n \rightarrow \pi^*$     | 5.42            | 0.026 | 37a-60a           | 18.7 |
|                 |                           |                 |       | 35a-60a           | 17.2 |
| S <sub>6</sub>  | $\pi \rightarrow R_{3s}$  | 5.84            | 0.005 | 39a-42a           | 55.4 |
| S <sub>7</sub>  | $\pi \rightarrow R_{3s}$  | 5.95            | 0.001 | 39a-45a           | 33.5 |
|                 |                           |                 |       | 39a-42a           | 13.2 |
| S <sub>8</sub>  | $\pi \rightarrow R_{3s}$  | 5.99            | 0.009 | 39a-43a           | 35.1 |
|                 | $\pi \rightarrow R_{3px}$ |                 |       | 39a-44a           | 27.4 |
| S <sub>9</sub>  | $n \rightarrow R_{3s}$    | 6.03            | 0.010 | 37a-40a           | 28.7 |
|                 |                           |                 |       | 35a-40a           | 14.5 |
| S <sub>10</sub> | $n \rightarrow \pi^*$     | 6.09            | 0.006 | 37a-60a           | 17.2 |
|                 |                           |                 |       | 37a-64a           | 15.3 |
| S <sub>11</sub> | $\pi \rightarrow R_{3px}$ | 6.21            | 0.001 | 39a-44a           | 39.2 |
|                 | $\pi \rightarrow R_{3s}$  |                 |       | 39a-43a           | 32.8 |
| S <sub>12</sub> | $n \rightarrow \pi^*$     | 6.23            | 0.001 | 35a-60a           | 26.8 |
|                 |                           |                 |       | 35a-64a           | 12.6 |
| S <sub>13</sub> | $\pi \rightarrow \pi^*$   | 6.33            | 0.015 | 39a-77a           | 21.0 |
|                 | $\pi \rightarrow R_{3s}$  |                 |       | 39a-46a           | 15.0 |
| S <sub>14</sub> | $n \rightarrow R_{3s}$    | 6.37            | 0.002 | 37a-41a           | 20.8 |
|                 |                           |                 |       | 37a-40a           | 10.3 |
| S <sub>15</sub> | $n \rightarrow \pi^*$     | 6.39            | 0.001 | 35a-61a           | 11.7 |
|                 |                           |                 |       | 37a-60a           | 9.3  |

## F. Cytosine –CC2/TZVP

| State           | Assignment               | $\Delta E$ (eV) | $f$   | Main contribution | %    |
|-----------------|--------------------------|-----------------|-------|-------------------|------|
| S <sub>1</sub>  | $\pi \rightarrow \pi^*$  | 4.71            | 0.051 | 29a-30a           | 81.6 |
| S <sub>2</sub>  | $n \rightarrow \pi^*$    | 4.95            | 0.007 | 27a-30a           | 83.7 |
| S <sub>3</sub>  | $n \rightarrow \pi^*$    | 5.35            | 0.009 | 26a-30a           | 81.5 |
| S <sub>4</sub>  | $\pi \rightarrow \pi^*$  | 5.77            | 0.155 | 28a-30a           | 84.2 |
| S <sub>5</sub>  | $n \rightarrow \pi^*$    | 5.94            | 0.003 | 27a-33a           | 52.3 |
| S <sub>6</sub>  | $\pi \rightarrow R_{3s}$ | 6.54            | 0.311 | 29a-31a           | 51.1 |
|                 | $\pi \rightarrow \pi^*$  |                 |       | 29a-33a           | 29.8 |
| S <sub>7</sub>  | $\pi \rightarrow \pi^*$  | 6.66            | 0.303 | 29a-33a           | 40.8 |
|                 | $\pi \rightarrow R_{3s}$ |                 |       | 29a-32a           | 21.1 |
| S <sub>8</sub>  | $n \rightarrow \pi^*$    | 6.76            | 0.009 | 26a-33a           | 38.8 |
|                 |                          |                 |       | 27a-33a           | 21.5 |
| S <sub>9</sub>  | $\pi \rightarrow R_{3s}$ | 6.93            | 0.067 | 28a-31a           | 31.7 |
|                 | $\pi \rightarrow \pi^*$  |                 |       | 28a-33a           | 20.4 |
| S <sub>10</sub> | $n \rightarrow R_{3s}$   | 7.13            | 0.026 | 27a-31a           | 46.4 |
|                 |                          |                 |       | 26a-31a           | 14.5 |

## G. Cytosine – CC2/TZVP-aug

| State           | Assignment                | $\Delta E$ (eV) | $f$   | Main contribution | %    |
|-----------------|---------------------------|-----------------|-------|-------------------|------|
| S <sub>1</sub>  | $\pi \rightarrow \pi^*$   | 4.61            | 0.052 | 29a-41a           | 25.9 |
|                 |                           |                 |       | 29a-42a           | 20.2 |
| S <sub>2</sub>  | $n \rightarrow \pi^*$     | 4.87            | 0.007 | 27a-41a           | 26.7 |
|                 |                           |                 |       | 27a-42a           | 20.3 |
| S <sub>3</sub>  | $n \rightarrow \pi^*$     | 5.27            | 0.01  | 26a-41a           | 24.6 |
|                 |                           |                 |       | 26a-42a           | 19.5 |
| S <sub>4</sub>  | $\pi \rightarrow R_{3s}$  | 5.44            | 0.006 | 29a-30a           | 64.3 |
| S <sub>5</sub>  | $\pi \rightarrow \pi^*$   | 5.64            | 0.127 | 28a-41a           | 24.8 |
|                 |                           |                 |       | 28a-42a           | 20.3 |
| S <sub>6</sub>  | $n \rightarrow \pi^*$     | 5.79            | 0.006 | 27a-53a           | 22.4 |
|                 |                           |                 |       | 27a-54a           | 17.3 |
| S <sub>7</sub>  | $n \rightarrow R_{3s}$    | 5.92            | 0.051 | 27a-30a           | 38.2 |
| S <sub>8</sub>  | $\pi \rightarrow R_{3s}$  | 6.00            | 0.026 | 29a-31a           | 43.9 |
| S <sub>9</sub>  | $\pi \rightarrow R_{3s}$  | 6.04            | 0.002 | 28a-30a           | 32.7 |
|                 |                           |                 |       | 29a-31a           | 17.5 |
| S <sub>10</sub> | $\pi \rightarrow \pi^*$   | 6.28            | 0.388 | 29a-53a           | 19.8 |
|                 |                           |                 |       | 29a-54a           | 15.8 |
| S <sub>11</sub> | $\pi \rightarrow R_{3s}$  | 6.32            | 0.003 | 29a-32a           | 34.1 |
|                 |                           |                 |       | 29a-35a           | 10.2 |
| S <sub>12</sub> | $n \rightarrow R_{3s}$    | 6.39            | 0.075 | 27a-31a           | 17.8 |
|                 |                           |                 |       | 26a-30a           | 15.3 |
| S <sub>13</sub> | $\pi \rightarrow R_{3px}$ | 6.52            | 0.021 | 29a-34a           | 55.1 |
| S <sub>14</sub> | $n \rightarrow R_{3s}$    | 6.53            | 0.033 | 27a-31a           | 30.5 |
|                 |                           |                 |       | 26a-30a           | 18.0 |
| S <sub>15</sub> | $n \rightarrow \pi^*$     | 6.59            | 0.025 | 26a-53a           | 11.2 |
|                 |                           |                 |       | 26a-54a           | 7.9  |
| S <sub>16</sub> | $\pi \rightarrow R_{3s}$  | 6.66            | 0.03  | 28a-31a           | 33.7 |
| S <sub>17</sub> | $\pi \rightarrow R_{3s}$  | 6.74            | 0.01  | 29a-35a           | 22.0 |
| S <sub>18</sub> | $n \rightarrow R_{3s}$    | 6.75            | 0.10  | 27a-32a           | 29.8 |
| S <sub>19</sub> | $\pi \rightarrow \pi^*$   | 6.76            | 0.07  | 28a-53a           | 10   |
|                 |                           |                 |       | 28a-54a           | 8.2  |
| S <sub>20</sub> | $n \rightarrow R_{3s}$    | 6.91            | 0.00  | 26a-31a           | 31.9 |
| S <sub>21</sub> | $n \rightarrow R_{3px}$   | 6.94            | 0.00  | 27a-34a           | 42.3 |
| S <sub>22</sub> | $\pi \rightarrow R_{3s}$  | 6.98            | 0.00  | 29a-33a           | 38.8 |
| S <sub>23</sub> | $\pi \rightarrow R_{3s}$  | 7.05            | 0.00  | 28a-32a           | 39.9 |
| S <sub>24</sub> | $n \rightarrow R_{3s}$    | 7.14            | 0.00  | 27a-35a           | 18.5 |
| S <sub>25</sub> | $n \rightarrow R_{3s}$    | 7.24            | 0.02  | 27a-32a           | 15.0 |
|                 |                           |                 |       | 26a-32a           | 14.7 |

## H. Thymine – CC2/TZVP

| State          | Assignment               | $\Delta E$ (eV) | $f$   | Main contribution | %    |
|----------------|--------------------------|-----------------|-------|-------------------|------|
| S <sub>1</sub> | $n \rightarrow \pi^*$    | 4.93            | 0.000 | 31a-34a           | 84.6 |
| S <sub>2</sub> | $\pi \rightarrow \pi^*$  | 5.37            | 0.197 | 33a-34a           | 87.4 |
| S <sub>3</sub> | $n \rightarrow \pi^*$    | 6.32            | 0.000 | 31a-38a           | 37.9 |
|                |                          |                 |       | 30a-34a           | 36.5 |
| S <sub>4</sub> | $\pi \rightarrow \pi^*$  | 6.44            | 0.082 | 32a-34a           | 93.7 |
| S <sub>5</sub> | $\pi \rightarrow R_{3s}$ | 6.68            | 0.000 | 33a-35a           | 69.5 |
| S <sub>6</sub> | $n \rightarrow \pi^*$    | 6.73            | 0.000 | 30a-34a           | 43.1 |

|                 |                          |      |       |         |      |
|-----------------|--------------------------|------|-------|---------|------|
| S <sub>7</sub>  | $\pi \rightarrow \pi^*$  | 6.79 | 0.250 | 31a-38a | 25.7 |
| S <sub>8</sub>  | $n \rightarrow \pi^*$    | 7.18 | 0.000 | 33a-38a | 89.9 |
| S <sub>9</sub>  | $n \rightarrow R_{3s}$   | 7.53 | 0.019 | 30a-38a | 67.1 |
| S <sub>10</sub> | $\pi \rightarrow R_{3s}$ | 7.67 | 0.000 | 31a-35a | 61.8 |
|                 |                          |      |       | 33a-37a | 55.0 |

### I. Thymine – CC2/TZVP-aug

| State           | Assignment                | $\Delta E$ (eV) | $f$   | Main contribution | %    |
|-----------------|---------------------------|-----------------|-------|-------------------|------|
| S <sub>1</sub>  | $n \rightarrow \pi^*$     | 4.83            | 0.000 | 31a-45a           | 44.8 |
| S <sub>2</sub>  | $\pi \rightarrow \pi^*$   | 5.18            | 0.178 | 33a-45a           | 42.2 |
| S <sub>3</sub>  | $\pi \rightarrow R_{3s}$  | 5.60            | 0.000 | 33a-34a           | 67.1 |
| S <sub>4</sub>  | $n \rightarrow \pi^*$     | 6.16            | 0.000 | 30a-45a           | 18.3 |
|                 |                           |                 |       | 31a-61a           | 17.0 |
| S <sub>5</sub>  | $\pi \rightarrow \pi^*$   | 6.22            | 0.016 | 32a-45a           | 30.1 |
|                 | $n \rightarrow R_{3s}$    |                 |       | 31a-34a           | 18.3 |
| S <sub>6</sub>  | $n \rightarrow R_{3s}$    | 6.30            | 0.082 | 31a-34a           | 42.3 |
| S <sub>7</sub>  | $\pi \rightarrow R_{3s}$  | 6.34            | 0.001 | 33a-35a           | 38.6 |
| S <sub>8</sub>  | $\pi \rightarrow \pi^*$   | 6.45            | 0.147 | 33a-59a           | 36.7 |
| S <sub>9</sub>  | $\pi \rightarrow R_{3s}$  | 6.49            | 0.000 | 33a-36a           | 42.2 |
| S <sub>10</sub> | $n \rightarrow \pi^*$     | 6.55            | 0.001 | 30a-45a           | 25.5 |
| S <sub>11</sub> | $\pi \rightarrow R_{3px}$ | 6.71            | 0.012 | 33a-37a           | 48.5 |
| S <sub>12</sub> | $n \rightarrow R_{3s}$    | 6.78            | 0.098 | 31a-36a           | 20.3 |
|                 |                           |                 |       | 31a-34a           | 15.1 |
| S <sub>13</sub> | $n \rightarrow R_{3s}$    | 6.94            | 0.014 | 30a-34a           | 24.2 |
|                 |                           |                 |       | 31a-35a           | 18.9 |
| S <sub>14</sub> | $n \rightarrow \pi^*$     | 7.00            | 0.000 | 30a-61a           | 30.4 |
| S <sub>15</sub> | $\pi \rightarrow R_{3s}$  | 7.02            | 0.000 | 32a-34a           | 38.6 |

### J. Uracil – CC2/TZVP

| State           | Assignment               | $\Delta E$ (eV) | $f$    | Main contribution | %    |
|-----------------|--------------------------|-----------------|--------|-------------------|------|
| S <sub>1</sub>  | $n \rightarrow \pi^*$    | 4.89            | 0.0000 | 27a-30a           | 85.1 |
| S <sub>2</sub>  | $\pi \rightarrow \pi^*$  | 5.50            | 0.1987 | 29a-30a           | 86.7 |
| S <sub>3</sub>  | $n \rightarrow \pi^*$    | 6.25            | 0.0000 | 27a-33a           | 42.6 |
|                 |                          |                 |        | 26a-30a           | 32.9 |
| S <sub>4</sub>  | $\pi \rightarrow \pi^*$  | 6.41            | 0.0595 | 28a-30a           | 94.5 |
| S <sub>5</sub>  | $n \rightarrow \pi^*$    | 6.72            | 0.0002 | 26a-30a           | 57.2 |
|                 |                          |                 |        | 27a-33a           | 37.4 |
| S <sub>6</sub>  | $\pi \rightarrow R_{3s}$ | 6.92            | 0.0002 | 29a-31a           | 90.3 |
| S <sub>7</sub>  | $\pi \rightarrow \pi^*$  | 6.96            | 0.1871 | 29a-33a           | 89.0 |
| S <sub>8</sub>  | $n \rightarrow \pi^*$    | 7.12            | 0.0000 | 26a-33a           | 75.1 |
| S <sub>9</sub>  | $n \rightarrow R_{3s}$   | 7.53            | 0.0580 | 27a-31a           | 54.4 |
|                 | $\pi \rightarrow \pi^*$  |                 |        | 28a-33a           | 21.3 |
| S <sub>10</sub> | $\pi \rightarrow \pi^*$  | 7.66            | 0.5351 | 28a-33a           | 56.9 |
|                 | $n \rightarrow R_{3s}$   |                 |        | 27a-31a           | 27.3 |

**K. Uracil – CC2/TZVP-aug**

| State          | Assignment      | $\Delta E$ (eV) | $f$   | Main contribution | %    |
|----------------|-----------------|-----------------|-------|-------------------|------|
| S <sub>1</sub> | n→ $\pi^*$      | 4.80            | 0.000 | 27a-40a           | 44.3 |
|                |                 |                 |       | 27a-36a           | 26.7 |
| S <sub>2</sub> | $\pi$ → $\pi^*$ | 5.32            | 0.178 | 29a-40a           | 41.5 |
|                |                 |                 |       | 29a-36a           | 29.9 |
| S <sub>3</sub> | $\pi$ → $\pi^*$ | 5.87            | 0.002 | 29a-30a           | 68.0 |
| S <sub>4</sub> | n→ $\pi^*$      | 6.09            | 0.000 | 27a-51a           | 34.8 |
|                |                 |                 |       | 26a-40a           | 15.5 |
| S <sub>5</sub> | n→ $\pi^*$      | 6.21            | 0.024 | 28a-40a           | 41.2 |
|                |                 |                 |       | 28a-36a           | 24.6 |



### III. Optimized geometries at CC2/TZVP level

Cartesian coordinates in Angstrom

#### A. Adenine

|   |           |           |           |
|---|-----------|-----------|-----------|
| c | 0.745129  | 0.565905  | -0.645930 |
| n | 0.325563  | 1.364241  | -1.687309 |
| c | -1.047993 | 1.421215  | -1.613009 |
| n | -1.555190 | 0.728173  | -0.608244 |
| c | -0.433260 | 0.205710  | 0.016994  |
| n | 1.995382  | 0.195446  | -0.335480 |
| c | 1.993246  | -0.644740 | 0.711057  |
| n | 0.944664  | -1.129118 | 1.409221  |
| c | -0.290307 | -0.735573 | 1.049506  |
| n | -1.355307 | -1.177352 | 1.779989  |
| h | -1.626123 | 1.990750  | -2.324268 |
| h | -1.186126 | -2.015987 | 2.316742  |
| h | -2.259700 | -1.097843 | 1.337886  |
| h | 2.965898  | -0.994081 | 1.037655  |
| h | 0.924784  | 1.822429  | -2.359759 |

#### B. Guanine

|   |           |           |           |
|---|-----------|-----------|-----------|
| c | -1.461583 | -0.214045 | 0.001053  |
| c | -0.464999 | 0.832910  | -0.011600 |
| c | 0.892214  | 0.479185  | 0.005837  |
| n | 1.460020  | -0.756240 | -0.002765 |
| c | 0.561252  | -1.715261 | 0.009299  |
| n | -0.792873 | -1.486910 | 0.015486  |
| n | -0.623077 | 2.201134  | -0.019781 |
| c | 0.609433  | 2.670838  | -0.012843 |
| n | 1.564227  | 1.674524  | 0.000725  |
| n | 0.963528  | -3.033336 | 0.090837  |
| o | -2.684451 | -0.165242 | 0.009897  |
| h | -1.430291 | -2.276917 | 0.101457  |
| h | 0.409282  | -3.699532 | -0.438500 |
| h | 1.960561  | -3.130026 | -0.076709 |
| h | 0.886808  | 3.724843  | -0.016307 |
| h | 2.573723  | 1.779999  | 0.008434  |

#### C. Cytosine

|   |           |           |           |
|---|-----------|-----------|-----------|
| c | -0.566632 | 0.750028  | -0.004958 |
| n | -1.322989 | -0.333549 | -0.026840 |
| c | -0.730789 | -1.578165 | -0.007719 |
| n | 0.688364  | -1.595305 | -0.149899 |
| c | 1.458042  | -0.480625 | -0.050254 |
| c | 0.866728  | 0.741316  | 0.026443  |
| o | -1.329044 | -2.645002 | 0.090897  |
| n | -1.211573 | 1.956484  | -0.108186 |
| h | 1.107704  | -2.515561 | -0.110852 |
| h | 2.530739  | -0.624282 | -0.064958 |
| h | 1.451878  | 1.647854  | 0.070739  |

|   |           |          |          |
|---|-----------|----------|----------|
| h | -0.738093 | 2.767326 | 0.259317 |
| h | -2.204335 | 1.909482 | 0.076270 |

#### D. Thymine

|   |           |           |           |
|---|-----------|-----------|-----------|
| o | -0.666471 | 2.323277  | 0.000002  |
| c | -0.581012 | 1.094123  | 0.000001  |
| c | 0.667876  | 0.336986  | 0.000000  |
| c | 0.603301  | -1.016224 | -0.000001 |
| n | -0.592498 | -1.702682 | 0.000005  |
| c | -1.838662 | -1.089767 | 0.000000  |
| n | -1.741135 | 0.294692  | -0.000003 |
| c | 1.952972  | 1.103054  | -0.000000 |
| h | 1.490338  | -1.637930 | 0.000000  |
| h | -0.609410 | -2.712767 | -0.000002 |
| o | -2.896673 | -1.707792 | 0.000000  |
| h | -2.624718 | 0.793653  | -0.000000 |
| h | 2.807985  | 0.425890  | -0.000000 |
| h | 2.014054  | 1.747743  | -0.877838 |
| h | 2.014054  | 1.747743  | 0.877837  |

#### E. Uracil

|   |           |           |           |
|---|-----------|-----------|-----------|
| c | 0.012104  | 1.423618  | -0.000000 |
| c | -1.159748 | 0.747608  | -0.000000 |
| n | -1.205123 | -0.626645 | 0.000001  |
| c | -0.072891 | -1.438985 | -0.000000 |
| n | 1.103963  | -0.706227 | 0.000000  |
| c | 1.271907  | 0.698194  | -0.000000 |
| o | -0.127201 | -2.662098 | -0.000000 |
| o | 2.398575  | 1.190369  | 0.000000  |
| h | 1.956937  | -1.255649 | -0.000000 |
| h | -2.086869 | -1.119597 | -0.000000 |
| h | 0.038981  | 2.502077  | -0.000000 |
| h | -2.121487 | 1.244113  | 0.000000  |

## References

- 1 L. Li and D. M. Lubman, *Anal. Chem.*, 1987, **59**, 2538-2541.
- 2 L. B. Clark, G. G. Peschel and I. Tinoco, *J. Phys. Chem.*, 1965, **69**, 3615-3618.
- 3 H. Du, R. C. A. Fuh, J. Z. Li, L. A. Corkan and J. S. Lindsey, *Photochem. Photobiol.*, 1998, **68**, 141-142.
- 4 C. T. Middleton, K. de La Harpe, C. Su, Y. K. Law, C. E. Crespo-Hernandez and B. Kohler, *Annu. Rev. Phys. Chem.*, 2009, **60**, 217-239.
- 5 F. Zaloudek, J. S. Novros and L. B. Clark, *J. Am. Chem. Soc.*, 1985, **107**, 7344-7351.
